# Supplementary material
Source: Research Square preprint supplement (doi:10.21203/rs.3.rs-9357199/v1)
Supplement: Supplementary file 1 [file 3cab496f248409d2a76058bb.docx]

**Supporting Information**

**IL-33/T-bet/15-LOX2-Mediated Crosstalk Between Neuroimmune and Lipid Metabolism Enhance Synaptic Remodeling and Social Function in Autism Spectrum Disorder**

Lili Li2,3#, Luyu Zhang1#, Lian Duan1#, Limin Hu2,3#, Yue Zhu2,3, Shuting Wang1, Hongmu Yan1, Xinyue Chen1, Jiayun Lu2, Cheng Gao1, Zufeng Wang1, Yan Chen2,3, Yanan Hu1, Luyang Tao1* and Yuan Gao1*

**Author Affiliations:**

1Department of Forensic Medicine, Jiangsu Key Laboratory of Drug Discovery and Translational Research for Brain Diseases, School of Basic Medical Sciences, Soochow University, Suzhou, Jiangsu 215123, China

2Department of Child and Adolescent Healthcare, Children’s Hospital of Soochow University, Suzhou, Jiangsu, 215021, China.

3Institute of Pediatric Research, Children's Hospital of Soochow University, Suzhou, Jiangsu, 215021, China.

Correspondence to: Yuan Gao, Luyang Tao

Department of Forensic Medicine, Jiangsu Key Laboratory of Drug Discovery and Translational Research for Brain Diseases, School of Basic Medical Sciences, Soochow University, Suzhou, Jiangsu 215123, China.

E-mail: gaoyuansz@suda.edu.cn (Yuan Gao)

Department of Forensic Medicine, Jiangsu Key Laboratory of Drug Discovery and Translational Research for Brain Diseases, School of Basic Medical Sciences, Soochow University, Suzhou, Jiangsu 215123, China.

E-mail: [taoluyang@s](mailto:huya_nan_good@126.com)uda.edu.cn (Luyang Tao)

**Supplementary Table S1-S2; Supplementary Figure S1-S3**

1. **Supplementary Tables**

Table S1. Primers used for real-time PCR

| **Gene** | **Primer sequence** | | **Species** |
| --- | --- | --- | --- |
| ***Tbx21*** | Forward  Reverse | 5′-CCC CCA AGG AAT TGA CAG TTG-3′  5′-GGG AAA CTA AAG CTC ACA AAC-3′ | Mouse |
| ***Alox15*** | Forward  Reverse | 5′-GGAUGUGUCAGGAUACCU UTT-3′  5′-AAGGUAUCCUGACACAUCCTT-3′ | Mouse |
| ***Alox12*** | Forward  Reverse | 5′-TCTGGAGATGGCCCTCAAAC -3′  5′-GAAGCTCTTCCATCCCCGAG -3′ | Mouse |

**Table S2.** Primary and secondary antibodies used for western blotting (WB), immunofluorescent (IF), and immunohistochemical (IHC) staining.

| **Antibody** | **Host** | | **Distributor** | **Working dilution** | |
| --- | --- | --- | --- | --- | --- |
| **Primary antibody** |  |  | | **WB** | **IF/IHC** |
| IL-33 | G | R&D (AF3626) | | 1:500 | 1:200 |
| ST2 | G | R&D (AF1004) | | 1:1000 |  |
| p-STAT1 | M | Santa Cruz (sc-8394) | | 1:1000 |  |
| STAT1 | M | Santa Cruz (sc-464) | | 1:1000 |  |
| T-bet | M | Santa Cruz (sc-21749) | | 1:1000 | 1:200 |
| RUNX1 | M | Santa Cruz (sc-365644) | | 1:1000 | 1:200 |
| RORγt | M | Santa Cruz (sc-293150) | | 1:1000; |  |
| IL-17 | M | Santa Cruz (sc-374218) | | 1:1000 |  |
| TGF-β | M | Santa Cruz (sc-374218) | | 1:1000 |  |
| SMAD1/2/3 | M | Santa Cruz (sc-7960) | | 1:1000 |  |
| FOXP3 | R | Abcam (ab65080) | | 1:500 |  |
| M | Santa Cruz (sc-376594) | | 1:500 |  |
| NF-κB | R | CST (D14E12) | | 1:1000 |  |
| GATA3 | M | Santa Cruz (sc-268) | | 1:1000 |  |
| TNF-α | M | Santa Cruz (sc-48418) | | 1:400 |  |
| JFC1 | R | Abcam (ab229381) | | 1:500 |  |
| ALOX15 | R | Abcam (ab189392) | | 1:500 | 1:200 |
| ALOX12 | M | CMCTAG (AT0002) | | 1:10000 |  |
| β-Tubulin | R | Affinity (AF7011) | | 1:1000 |  |
| PPARβ | M | Santa Cruz (sc-74517) | | 1:1000 |  |
| PLA2G4E | R | Santa Cruz (sc-51727) | | 1:5000 |  |
| CYP2B6 | M | Santa Cruz (sc-398788) | | 1:1000 |  |
| PRKACB | Rat | Biolegend (123102) | | 1:1000 |  |
| CYP2J2 | Rat | Biolegend (163702) | | 1:2000 |  |
| BDNF | R | Abcam (ab108319) | | 1:1000 |  |
| PSD95 | R | Affinity (AF6461) | | 1:1000 | 1:200 |
| C3 | M | Santa Cruz (sc-28294) | | 1:1000 | 1:200 |
| CR3 | M | Santa Cruz (sc-53086) | | 1:1000 |  |
| CXCR-4 | M | Santa Cruz (sc-53534) | | 1:1000 |  |
| CD206 | R | Biolegend (141702) | |  | 1:200 |
| Iba-1 | R | Abclonal (A19776) | |  | 1:200 |
| NeuN | R | Proteintech (13395-1-AP) | |  | 1:400 |
| GFAP | R | Abclonal (A0237) | | 1:1000 | 1:200 |
| DAPI | R | Beyotime Institute of Biotechnology (C1002) | |  | 1:5000 |
| TrkB | R | Abcam (ab48506) | | 1:1000 |  |
| **Secondary antibody** | | | | | |
| Anti-mouse HRP | G | Beyotime (A0286) | | 1:5000 |  |
| Anti-rabbit HRP | G | Beyotime (A0277) | | 1:5000 |  |
| Anti-goat HRP | D | Beyotime (A0181) | | 1:5000 |  |
| Anti-mouse AlexaFluor IgG | D | Abcam (ab150105)  Abcam (ab150108) | |  | 1:200  1:200 |
| Anti-rabbit AlexaFluor IgG | D | Abcam (ab150061)  Abcam (ab150080) | |  | 1:200  1:200 |
| Anti-goat AlexaFluor IgG | D | Abcam (ab150132) | | 1:200 |
| Anti-Rat AlexaFluor IgG | D | Abcam (ab150156)  Abcam (ab150153) | |  | 1:200  1:200 |
|  |  | M: mouse R: rabbit | | G: goat D: donkey | |

1. **Supplementary Figures**

**Fig. S1**

**
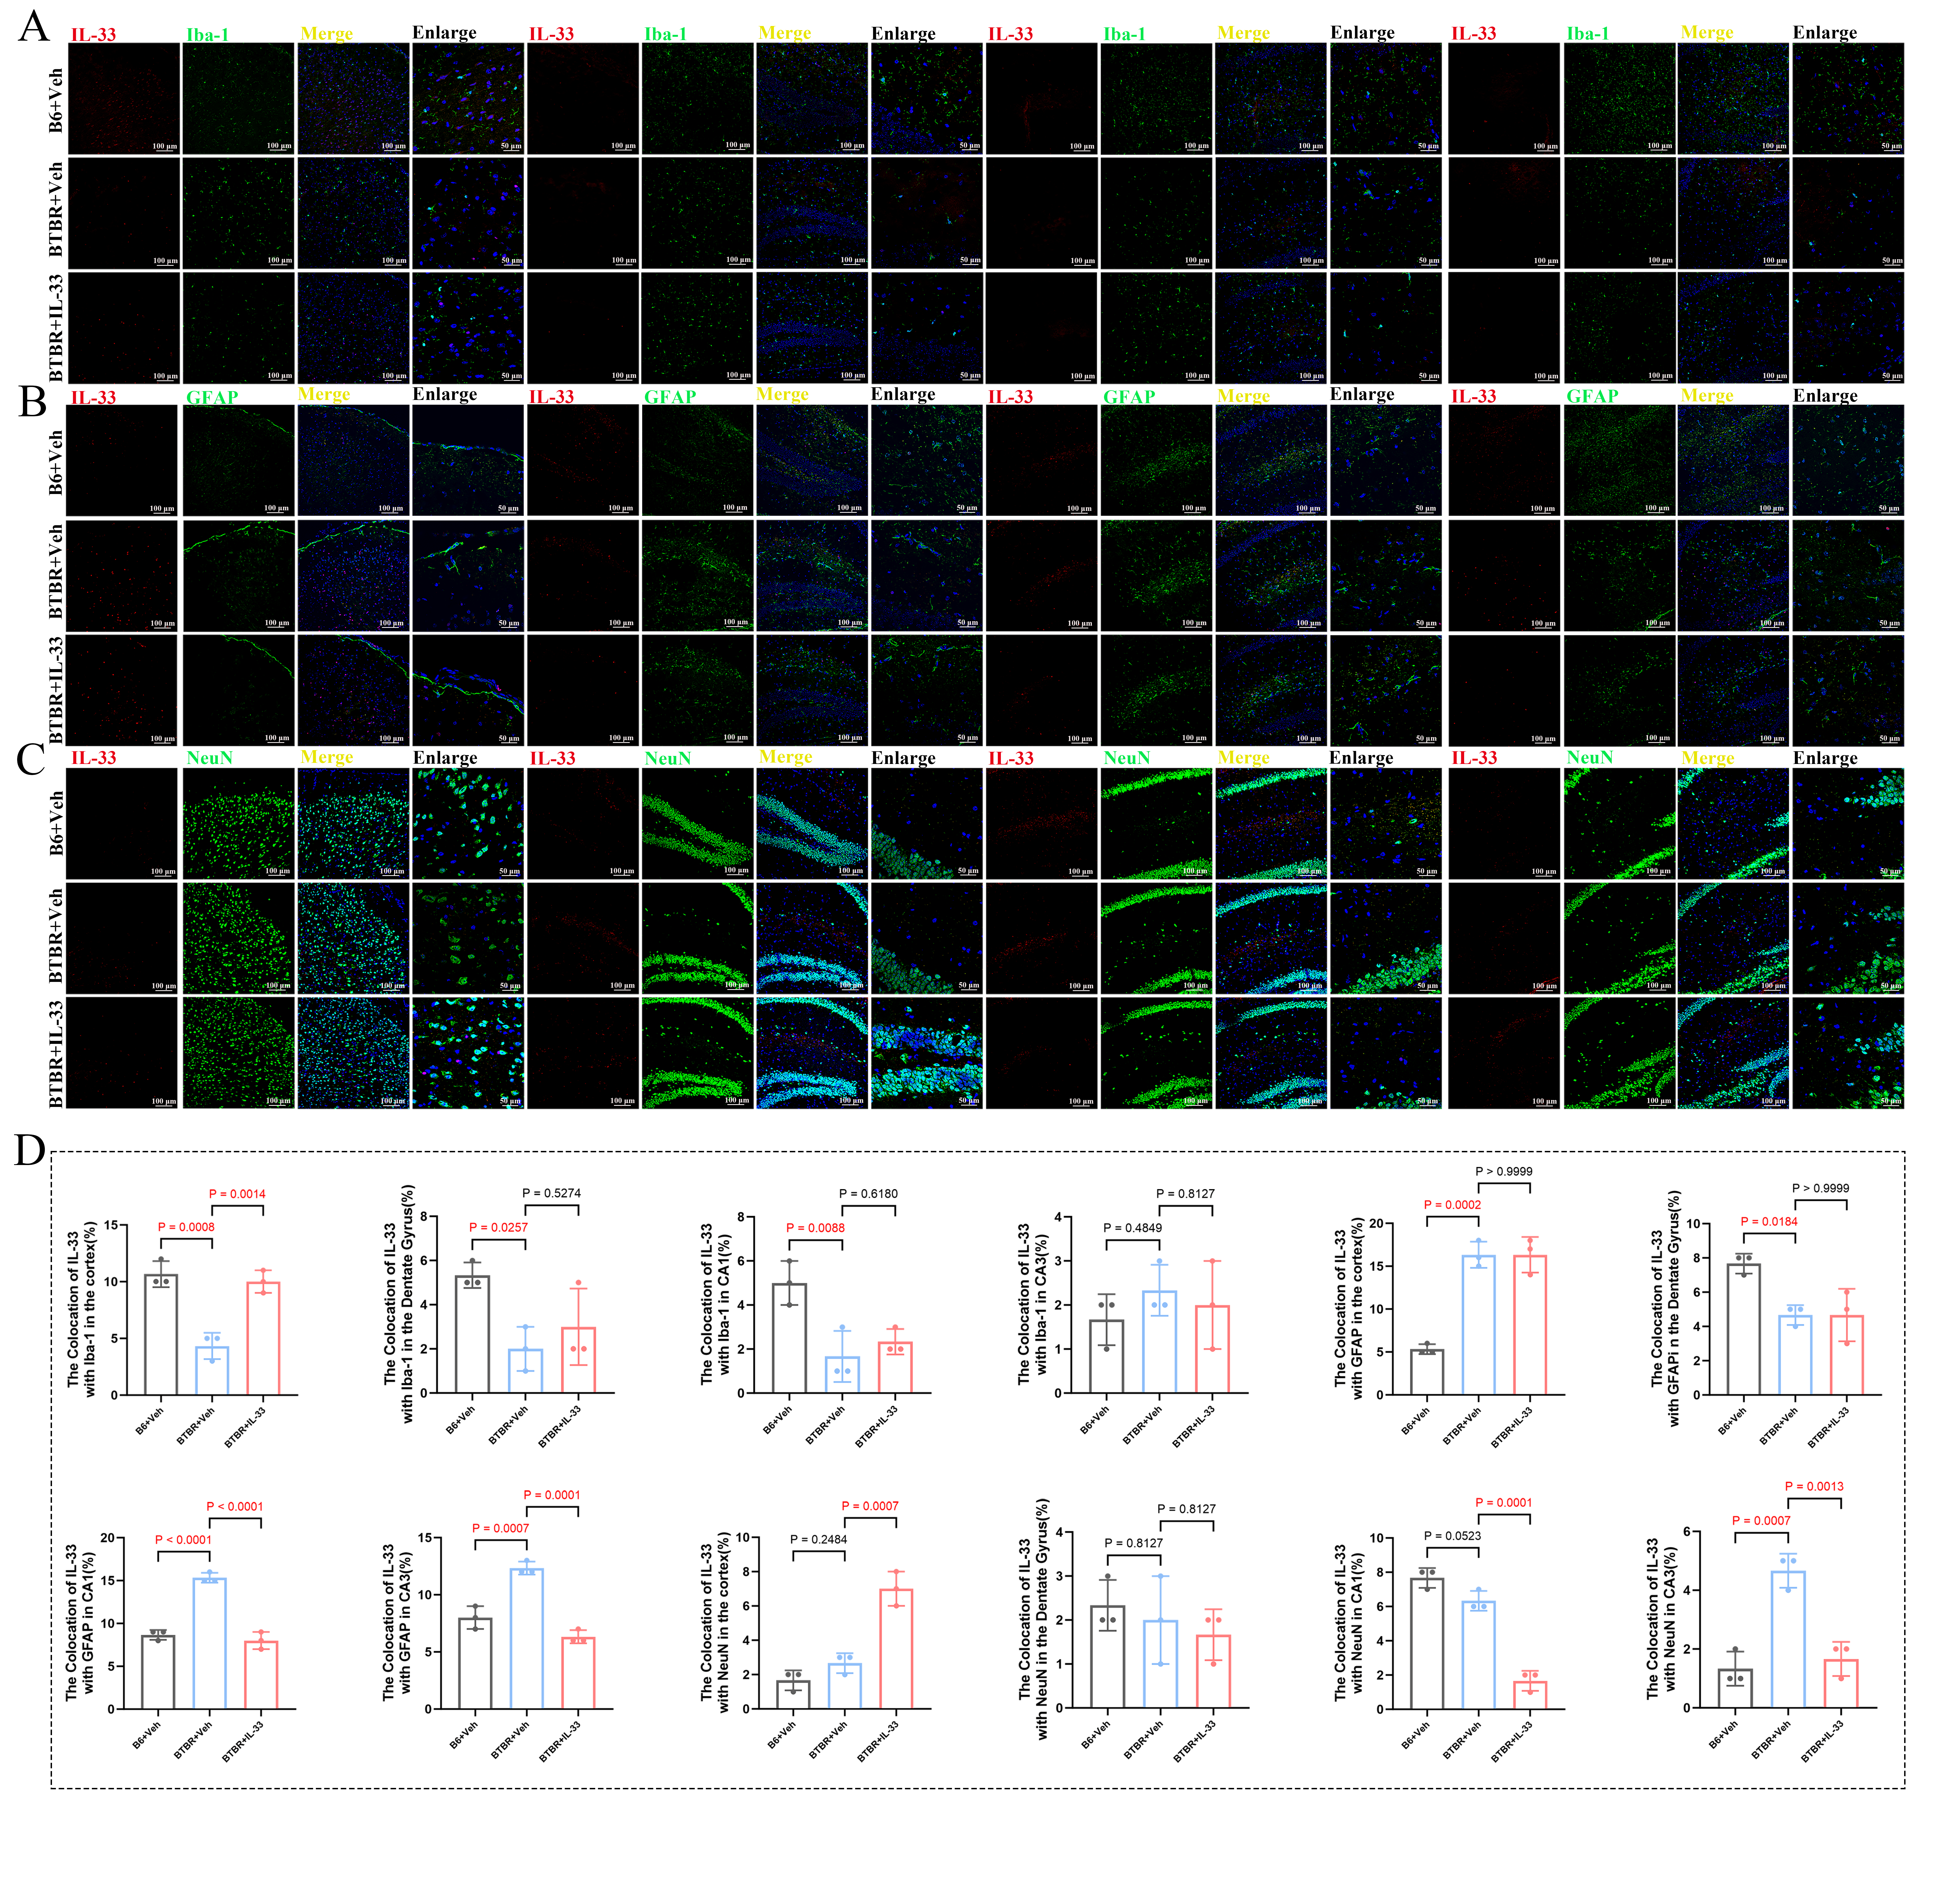
**

**Fig. S1 Cellular localization of IL-33 in different brain regions following ASD induction and IL-33 intervention.**

(A-C) Representative confocal immunofluorescence images showing the colocalization of IL-33 with Iba-1 (microglia, A), GFAP (astrocytes, B), and NeuN (neurons, C) in the cortex and hippocampus of BTBR mice, with or without IL-33 treatment. Scale bars: 100 μm (overview)/50 μm (insets). (D) Semi-quantitative analysis of the co-localization rate of IL-33 with Iba-1, GFAP and NeuN. Data are expressed as mean ± SEM. Analyses were performed across three independent experiments.

**Fig. S2**


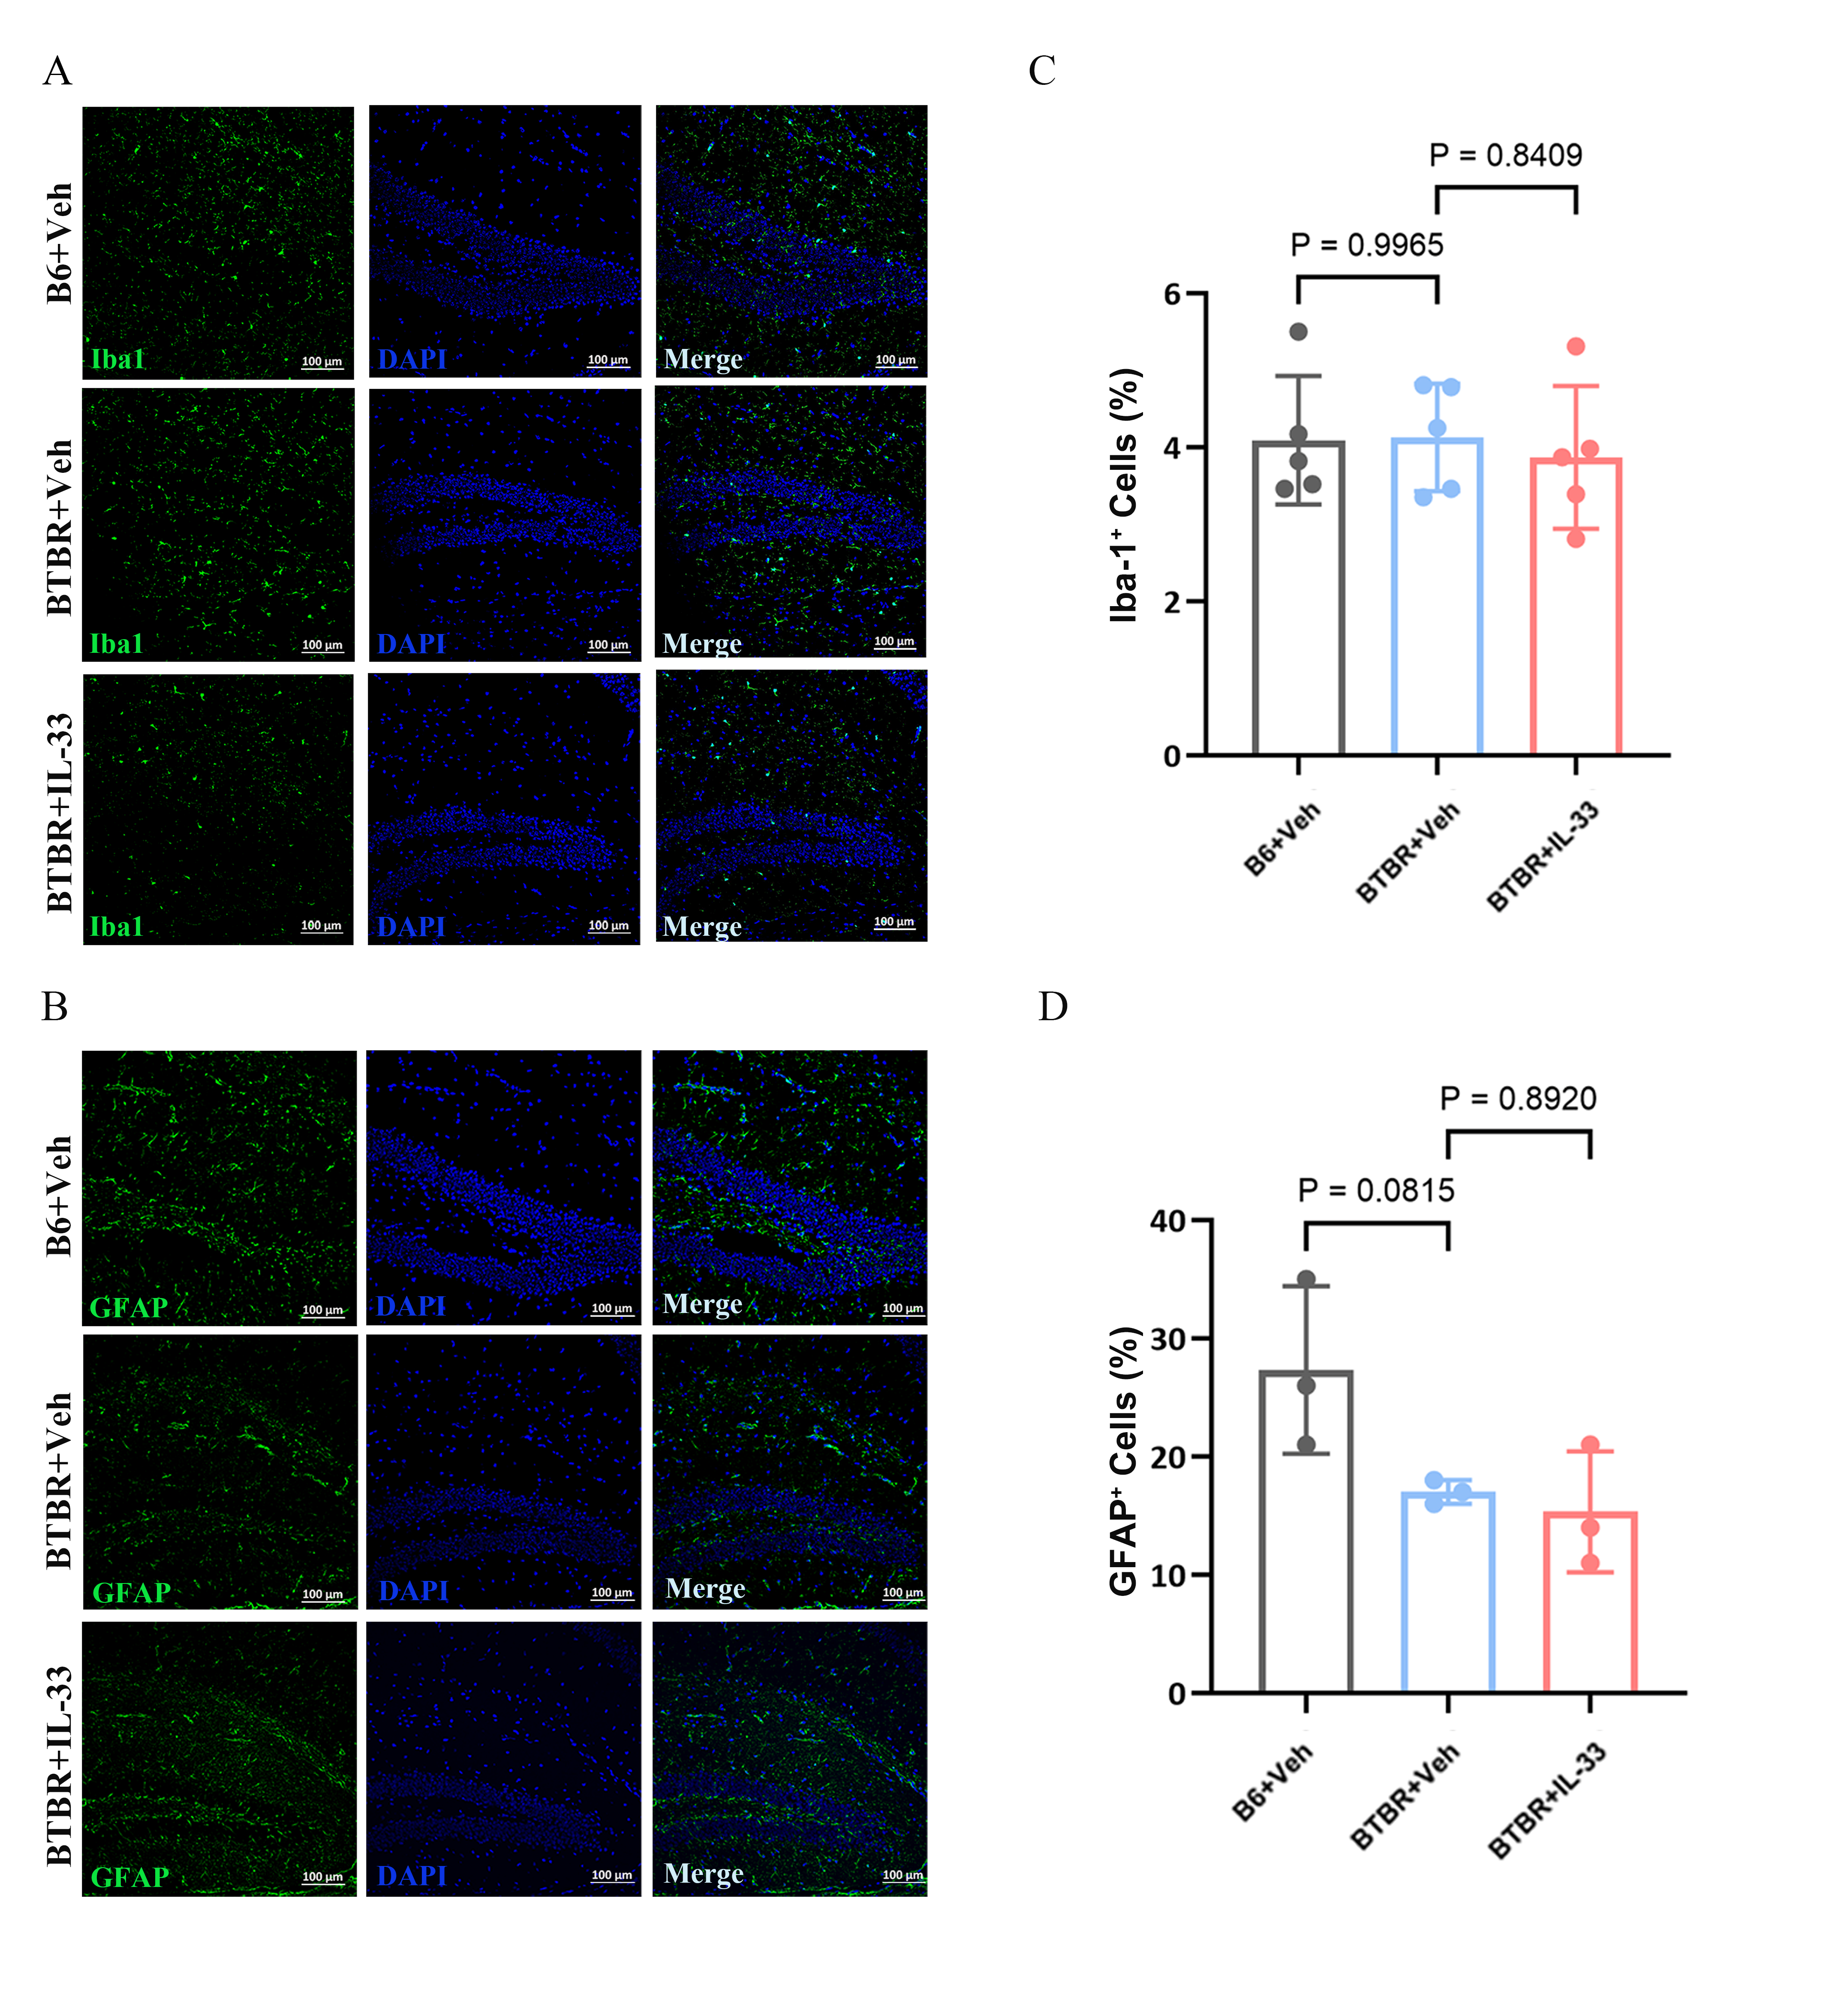


**Fig. S2 IL-33 treatment does not alter astrocyte or microglial cell numbers in ASD mice.**

(A, B) Representative immunofluorescence images showing Iba-1⁺ microglia (A) and GFAP⁺ astrocytes (B) in the brains of BTBR mice with or without IL-33 treatment. (C, D) Quantitative analyses of the proportion of Iba-1⁺ microglia (C) and GFAP⁺ astrocytes (D), demonstrating that IL-33 administration did not significantly affect the overall numbers of these glial cell populations.

**Fig. S3**

**

**

**Fig. S3 Spatial metabolomics reveals IL-33-mediated remodeling of lipid metabolism and pathway enrichment in ASD mouse brains.**

(A) Heatmap illustrating the significantly altered metabolites in the whole brain of BTBR mice compared with controls, together with the top 20 KEGG-enriched pathways, highlighting the modulatory effects of IL-33 treatment. (B) Heatmap showing the cortical metabolite alterations in BTBR mice and their enrichment in the top 20 KEGG pathways, with comparative changes after IL-33 administration. (C) Heatmap depicting hippocampal metabolite profiles and the top 20 enriched KEGG pathways, indicating IL-33-associated regulatory effects on metabolic processes. (D) Venn diagram presenting the overlap of differentially expressed metabolites across the whole brain, cortex, and hippocampus among B6, BTBR, and IL-33-treated groups, underscoring the region-specific metabolic remodeling induced by IL-33 in ASD mice.
